# Supplementary material for: High-dose ascorbic acid synergizes with anti-PD1 in a lymphoma mouse model
Source: PubMed Central journal article supplement (PMC6983418; doi:10.1073/pnas.1908158117), 2020-01-07
Supplement: pnas.1908158117.sapp.pdf [file pnas.1908158117.sapp.pdf]

## SUPPLEMENTAL FIGURES

Figure S1.

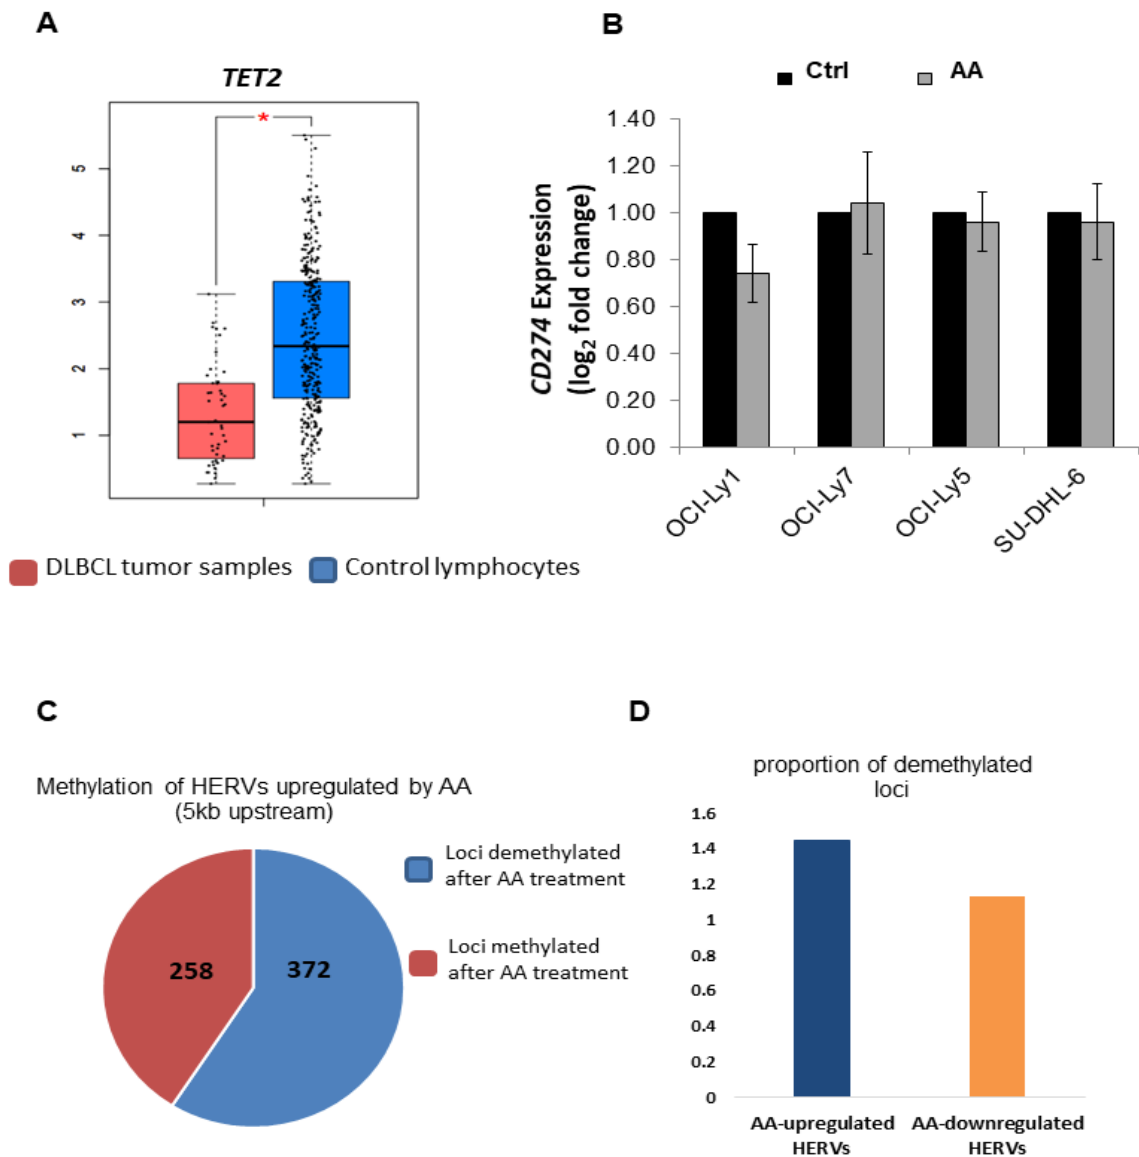

**Figure S1.** (A). TET2 mRNA expression in DLBCL (red) is significantly lower than control lymphocytes (blue) ( $P < 0.05$ ; TCGA, GTEX). (B). RT-PCR: PDL1 expression is unchanged after AA treatment in 4 DLBCL cell lines. (C). Global methylation analysis of HERVs upregulated with AA treatment revealed that ~60% of the loci (5kb window) were demethylated upon AA treatment. Loci representing both control treated (Ctrl\_1, Ctrl\_2) and AA treated (AA\_1, AA\_2) samples. (D) AA upregulated HERVs were associated with a higher proportion of demethylated loci when compared to the downregulated HERVs (27% difference between AA-upregulated and downregulated HERV associated methylation). Data derived from both control and AA treated samples.

Figure S2.

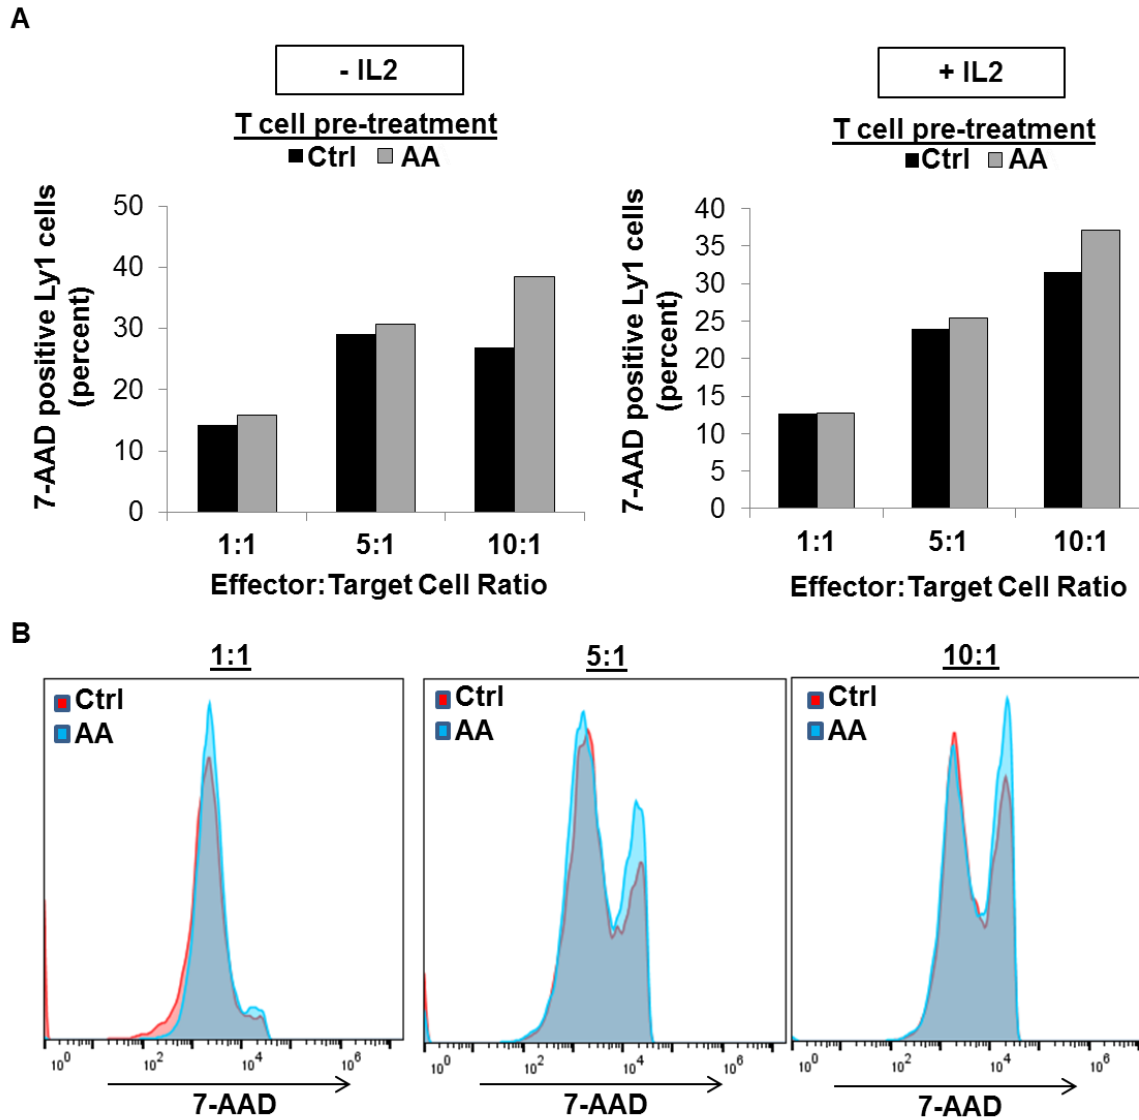

**Figure S2.** CD8<sup>+</sup> T cells (effector cells) pre-treated with AA exhibit increased cytotoxicity against OCI-Ly1 Bcell lymphoma cells (target cells).

(A). CD8<sup>+</sup> T cells were pre-treated with catalase with or without 1 mM AA for 6 hours. Following treatment, cells were washed and incubated with OCI-Ly1 cells at the indicated ratios for 48 hours in the presence or absence of 10 ng/ml IL2 (B). Representative flow cytometry histograms.

**Figure S3.**

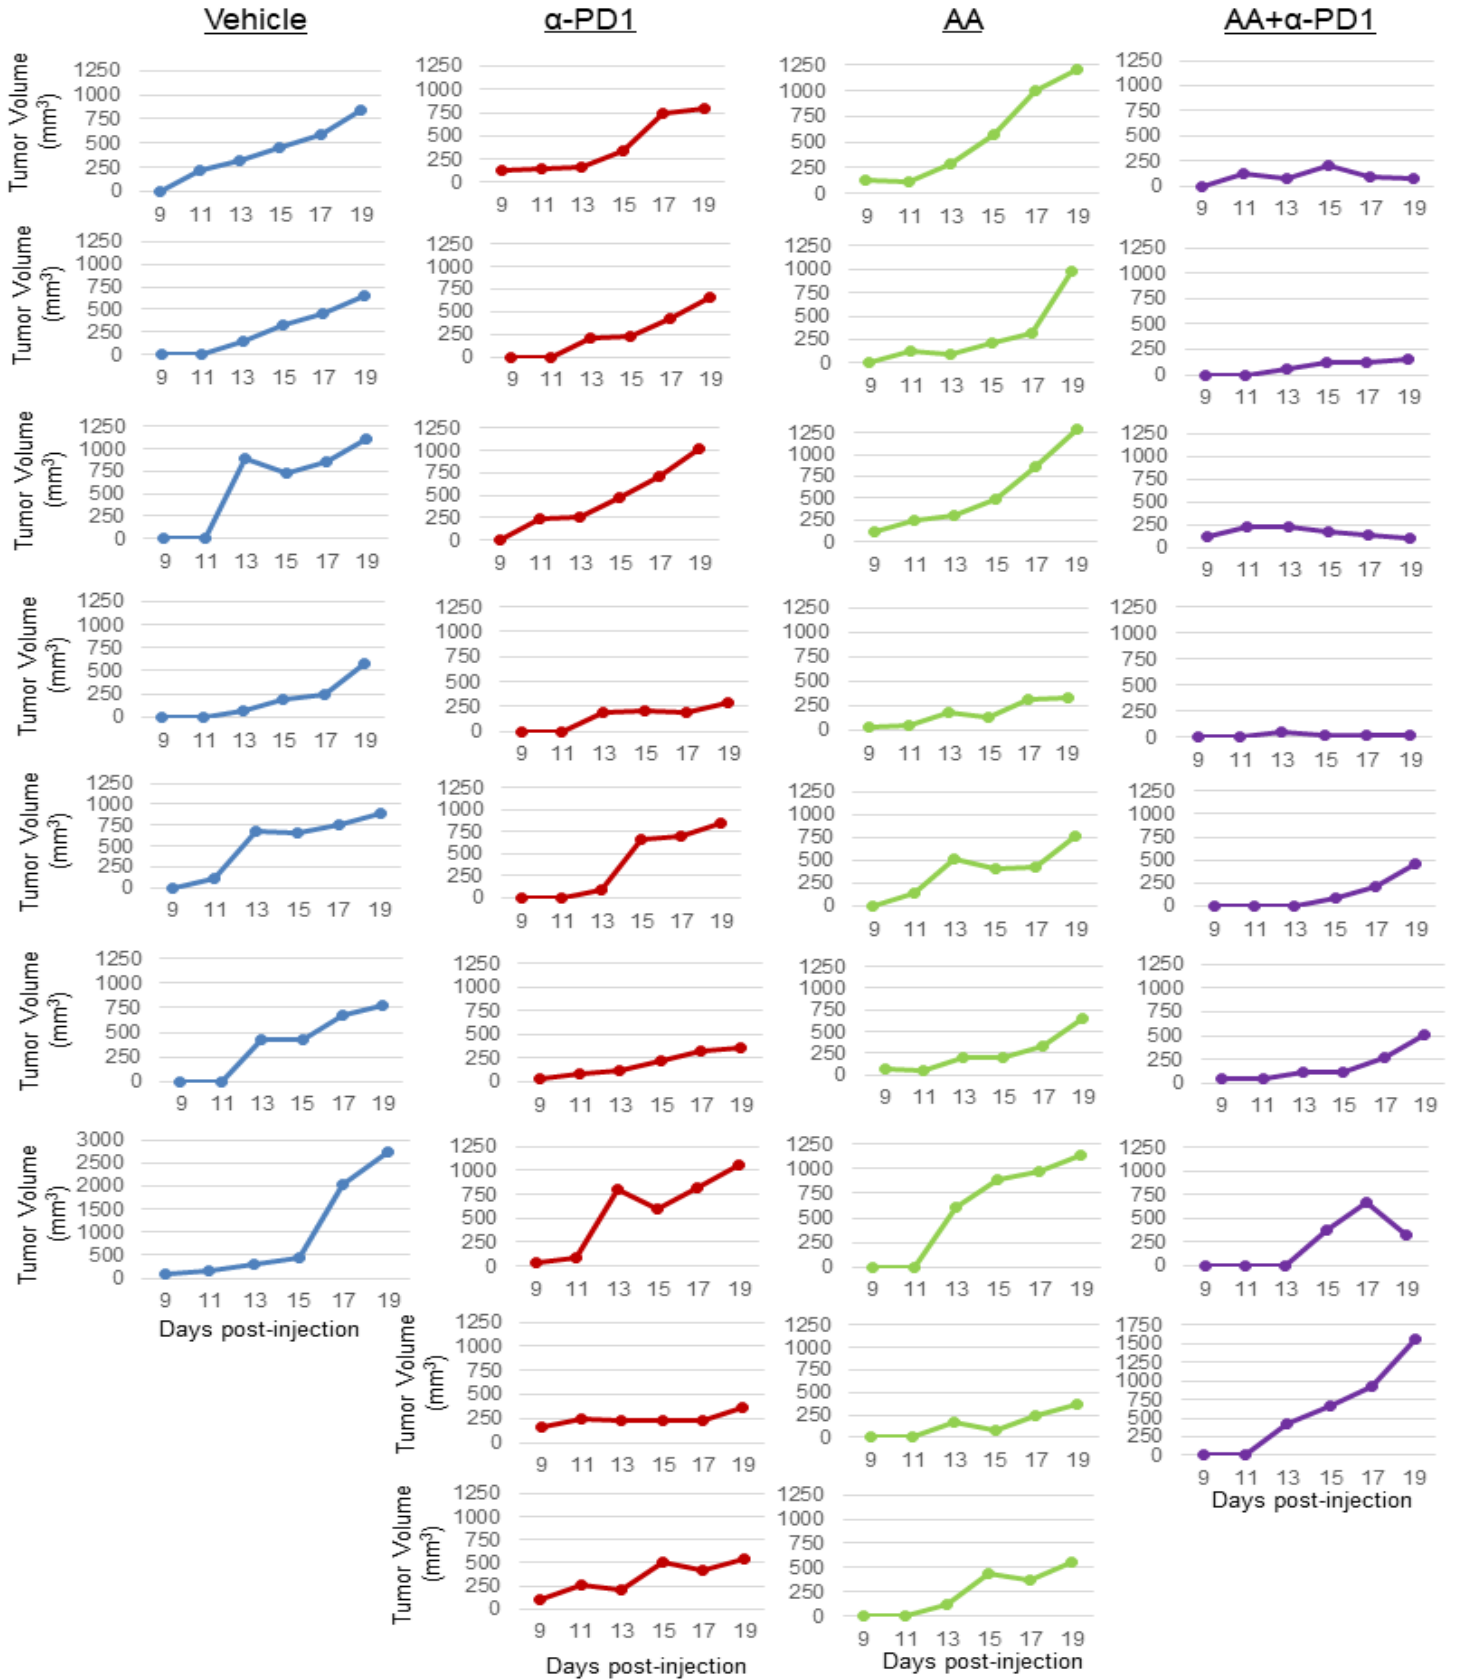

**Figure S3:** Growth curves of individual mice (Vehicle, n=7;  $\alpha$ -PD1, n=9; AA, n=9; AA+ $\alpha$ -PD1, n=8). All mice are represented in Fig 3B.

**Figure S4: CD8 (cytotoxic T cells)**

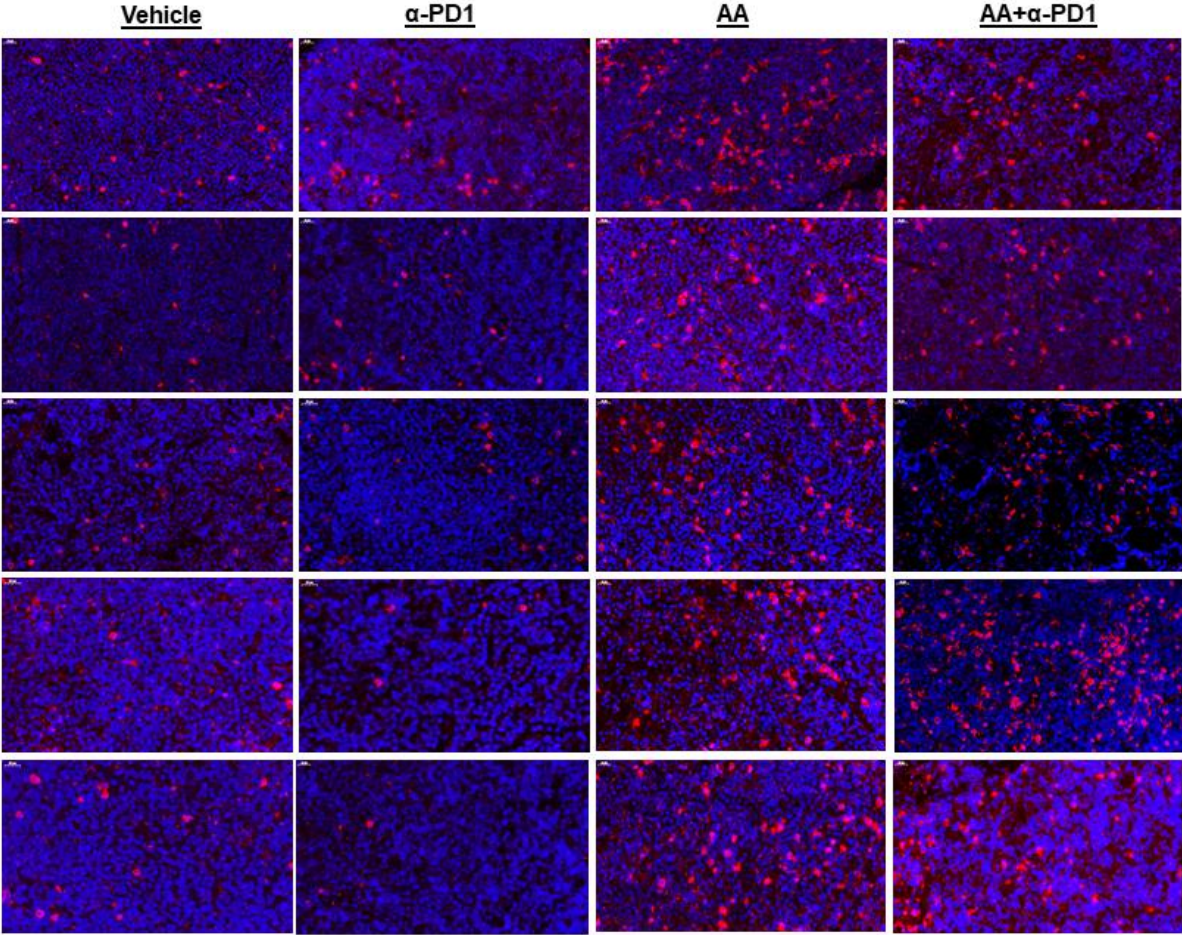

**Figure S4.** Representative CD8 immunofluorescence images for each mouse tumor tissue analyzed.  $\alpha$ -PD1, anti-PD1; AA, ascorbic acid. Images were captured at 50x magnification.

**Figure S5: Granzyme B**

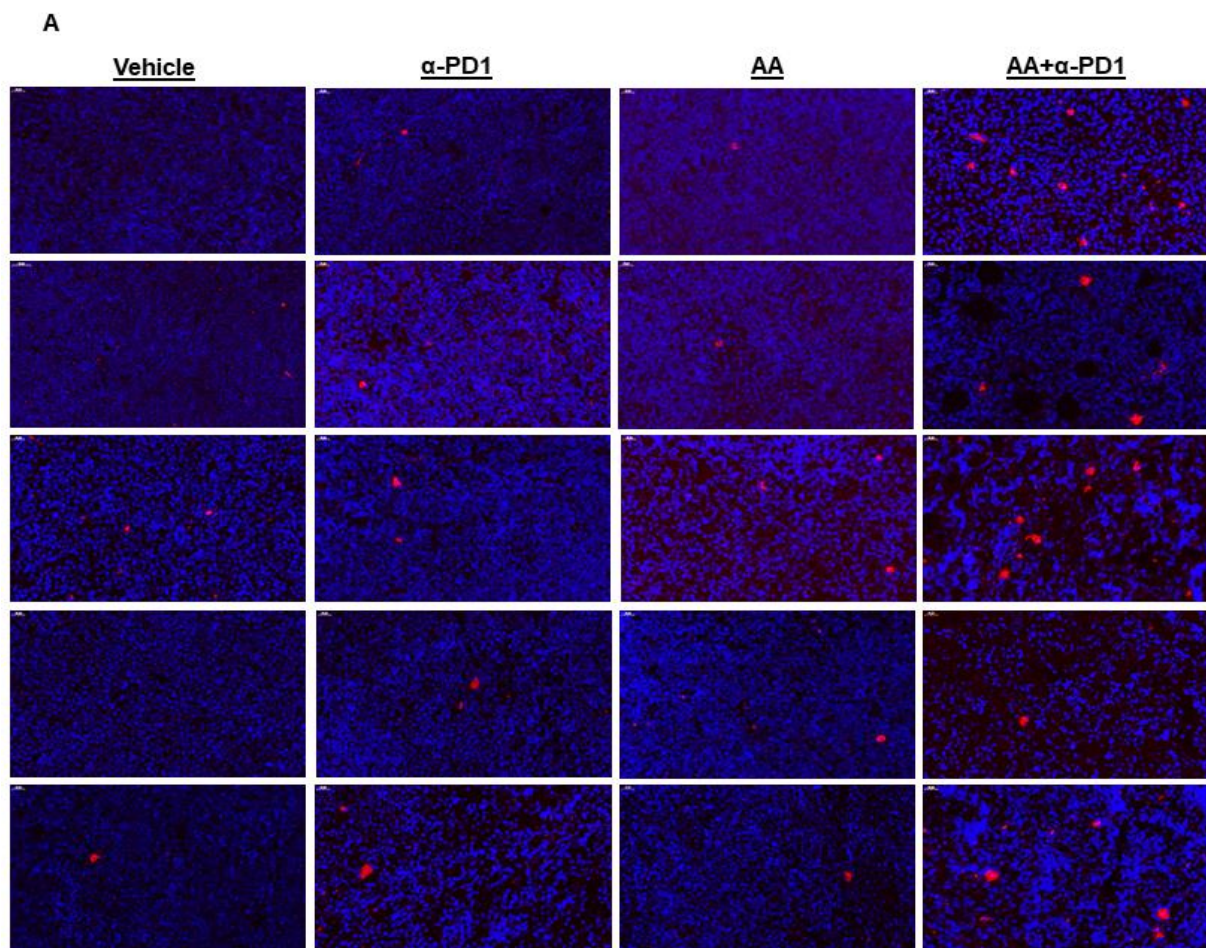

**Figure S5.** (A) Representative Granzyme B immunofluorescence images for each mouse tumor tissue analyzed.  $\alpha$ -PD1, anti-PD1; AA, ascorbic acid. Images were captured at 50x magnification. (B) Granzyme B/ CD8 ratio is significantly higher with anti-PD1 treatment compared to AA treatment.

**Figure S6: F4/80 (macrophages)**

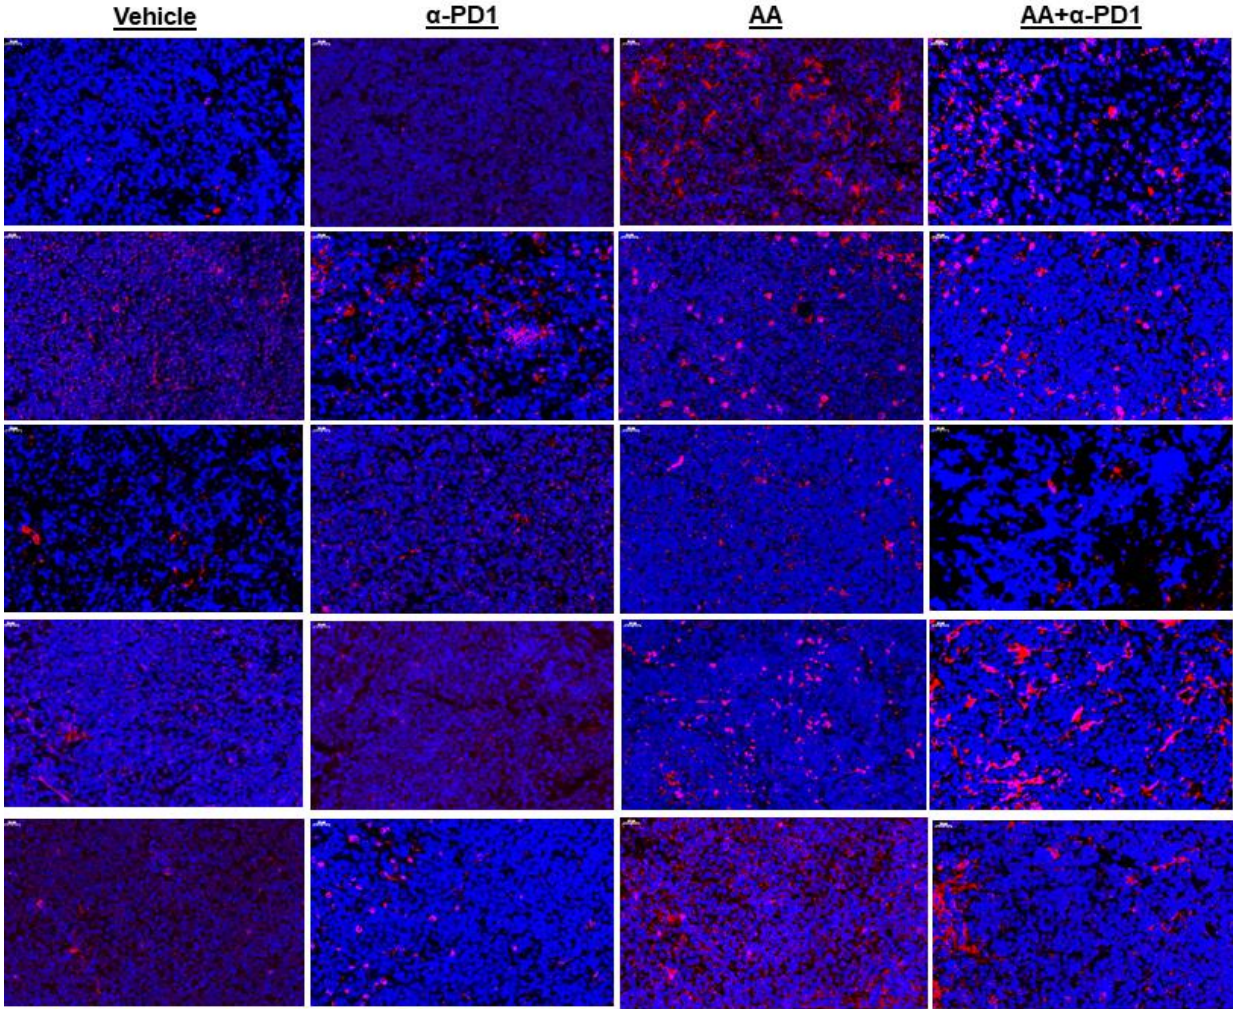

**Figure S6.** Representative F4/80 immunofluorescence images for each mouse tumor tissue analyzed.  $\alpha$ -PD1, anti-PD1; AA, ascorbic acid. Images were captured at 50x magnification.

**Figure S7: CD11c (dendritic cells)**

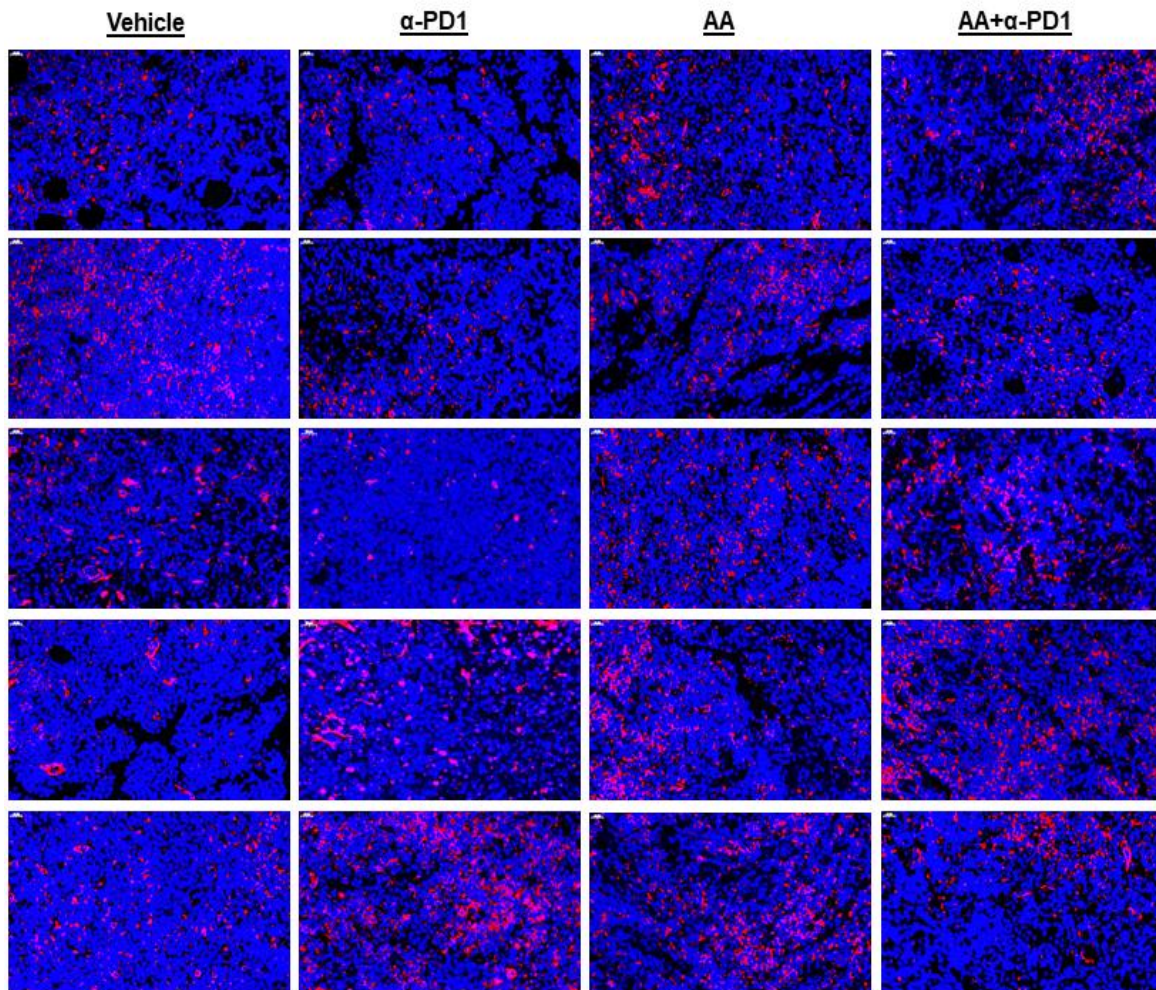

**Figure S7.** Representative CD11c immunofluorescence images for each mouse tumor tissue analyzed.  $\alpha$ -PD1, anti-PD1; AA, ascorbic acid. Images were captured at 50x magnification.

Figure S8: PD-L1

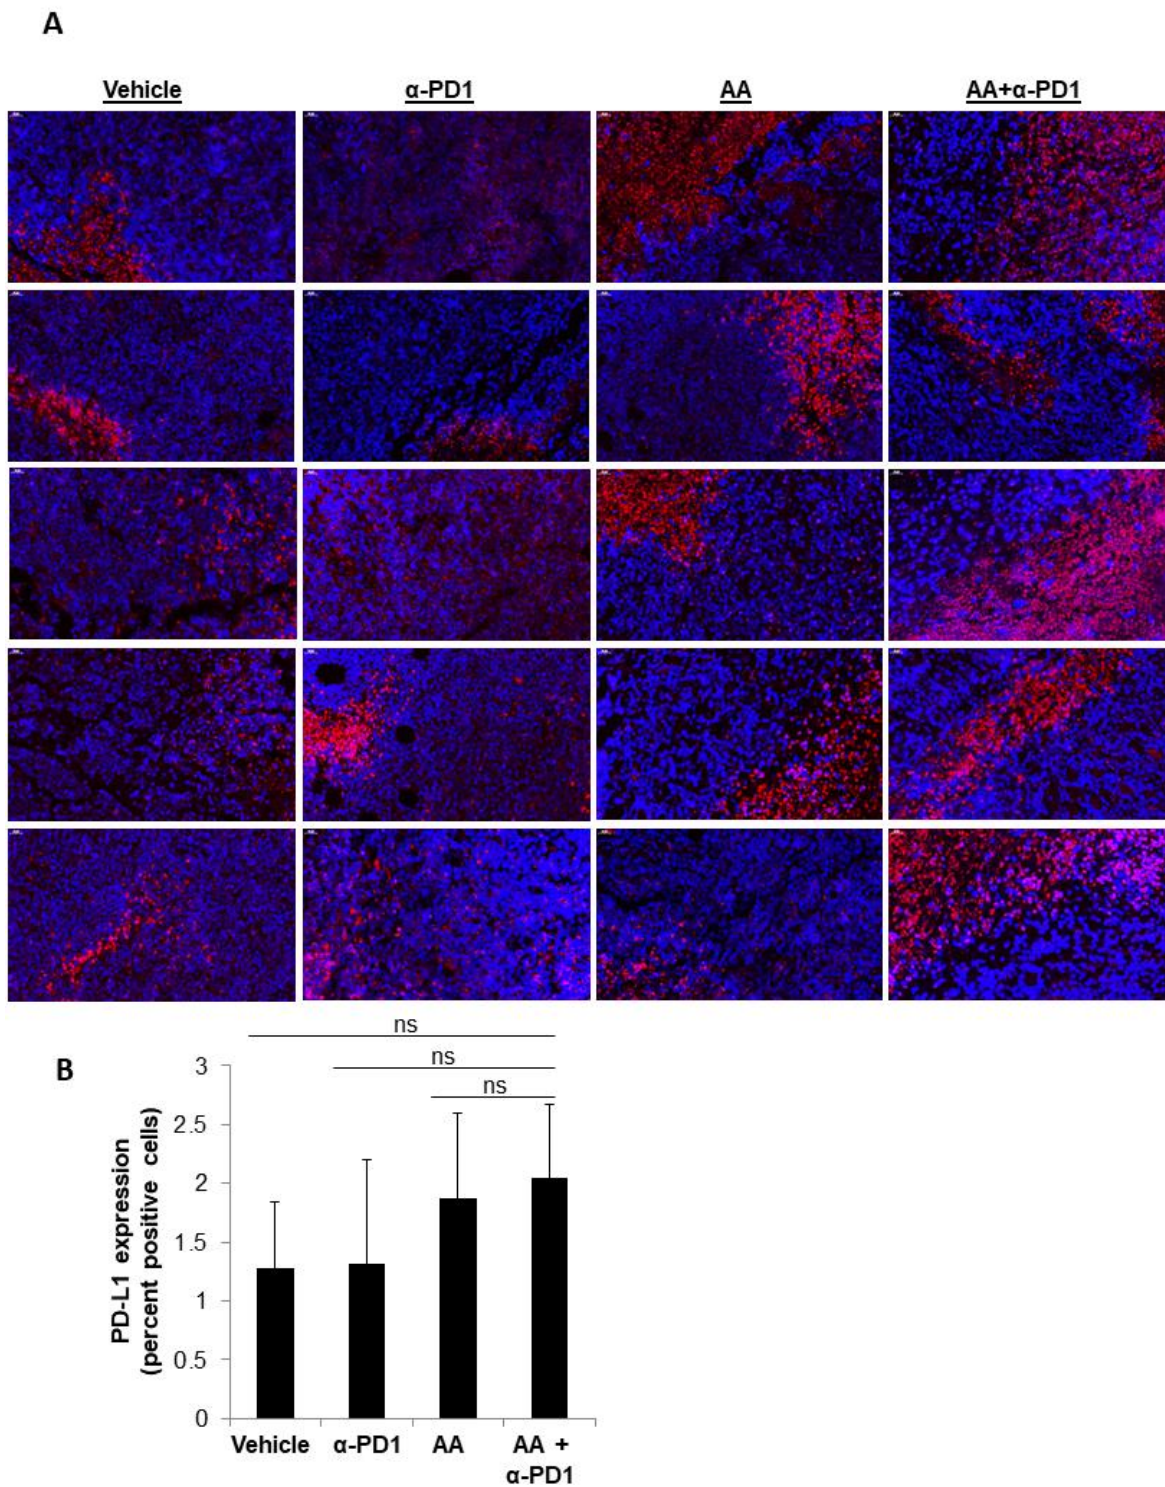

**Figure S8.** Representative PD-L1 immunofluorescence images for each mouse tumor tissue analyzed.  $\alpha$ -PD1, anti-PD1; AA, ascorbic acid. Images were captured at 50x magnification.
